# Supplementary material for: Fibronectin Modulates the Expression of miRNAs in Prostate Cancer Cell Lines
Source: PubMed Central journal article supplement (PMC9310065; doi:10.3389/fvets.2022.879997), 2022-07-11
Supplement: Table_1.pdf [file Table_1.pdf]

| Differentially expressed genes in both cell lines |          |          |          |             |          |          |          |
|---------------------------------------------------|----------|----------|----------|-------------|----------|----------|----------|
| <i>LnCaP</i>                                      |          |          |          | <i>PC-3</i> |          |          |          |
| Gene                                              | log2(FC) | P-value  | P-adj    | Gene        | log2(FC) | P-value  | P-adj    |
| ITGA6                                             | 4.585857 | 2.7E-263 | 3.5E-260 | CCND2       | 10.94613 | 1.5E-106 | 6.2E-103 |
| SERPINB5                                          | 8.391191 | 7.2E-240 | 6.7E-237 | MMP2        | 8.969008 | 6.19E-61 | 3.47E-58 |
| KLF5                                              | 6.054233 | 4E-128   | 8.8E-126 | SCNN1A      | 7.517658 | 8.3E-57  | 3.14E-54 |
| EPAS1                                             | 6.113061 | 2.1E-115 | 3.4E-113 | TP53        | 5.212684 | 4.13E-49 | 1.05E-46 |
| LAMC2                                             | 15.81223 | 4.48E-97 | 5.01E-95 | TP63        | 9.498666 | 2.47E-47 | 5.65E-45 |
| JAG1                                              | 2.196641 | 7.86E-88 | 7.21E-86 | BTG2        | 6.433306 | 2.61E-43 | 4.56E-41 |
| CD44                                              | 12.33859 | 2.18E-87 | 1.99E-85 | TIMP3       | 8.703089 | 1.29E-35 | 1.53E-33 |
| CDK6                                              | 7.22499  | 6.33E-82 | 5.02E-80 | FGFR2       | 7.041571 | 9.25E-28 | 6.4E-26  |
| DUSP6                                             | 8.231397 | 1.63E-80 | 1.24E-78 | PTEN        | 3.867297 | 1.89E-26 | 1.18E-24 |
| ETS1                                              | 7.564686 | 9E-78    | 6.42E-76 | ANXA1       | 2.457878 | 4.31E-25 | 2.42E-23 |
| MICAL2                                            | 2.727697 | 1.22E-74 | 8.19E-73 | LAMC2       | 3.923802 | 3.31E-17 | 1.03E-15 |
| SMAD3                                             | 3.354942 | 1.75E-70 | 1.06E-68 | FOS         | 5.284813 | 4.91E-16 | 1.39E-14 |
| ADAM17                                            | 2.888609 | 1.59E-67 | 9.15E-66 | CD44        | 2.3571   | 6.11E-16 | 1.72E-14 |
| ANXA1                                             | 12.38917 | 5.76E-61 | 2.72E-59 | SERPINB5    | 4.343776 | 1.24E-15 | 3.43E-14 |
| TGFBR2                                            | 9.824538 | 3.28E-59 | 1.49E-57 | SOX2        | 6.685487 | 5.69E-14 | 1.28E-12 |
| SERPINE1                                          | 12.64382 | 4.21E-59 | 1.9E-57  | TP53INP1    | 2.151772 | 5.89E-14 | 1.32E-12 |
| CCND2                                             | 11.9748  | 9.32E-58 | 4.09E-56 | ITGB8       | 2.573166 | 1.39E-12 | 2.67E-11 |
| CDKN1A                                            | 1.811404 | 1.43E-54 | 5.7E-53  | DLL1        | 5.071133 | 2.58E-12 | 4.89E-11 |
| MCL1                                              | 2.470131 | 2.31E-51 | 8.44E-50 | DDIT4       | 4.638898 | 9.91E-12 | 1.75E-10 |
| MET                                               | 11.26069 | 1.43E-48 | 4.73E-47 | MUC1        | 4.301074 | 1.71E-11 | 2.91E-10 |
| FSCN1                                             | 6.014127 | 6.07E-47 | 1.89E-45 | L1CAM       | 3.722584 | 2.21E-11 | 3.71E-10 |
| TNFAIP3                                           | 4.76437  | 1.34E-46 | 4.11E-45 | STAT5A      | 6.955505 | 7.49E-11 | 1.19E-09 |
| TP63                                              | 11.00487 | 3.26E-44 | 9.04E-43 | DUSP6       | 1.557224 | 8.34E-10 | 1.16E-08 |
| NOTCH2                                            | 1.479564 | 9.69E-44 | 2.63E-42 | IKZF2       | 3.042021 | 1.47E-09 | 1.99E-08 |
| RAB1A                                             | 1.928561 | 4.84E-42 | 1.21E-40 | ERBB3       | 2.265969 | 2.13E-09 | 2.82E-08 |
| HMGA2                                             | 10.71462 | 1.9E-41  | 4.65E-40 | SHROOM2     | 2.984449 | 4.79E-09 | 6.03E-08 |
| TIMP3                                             | 9.953337 | 3.5E-40  | 8.24E-39 | NOTCH1      | 2.819589 | 5.21E-09 | 6.52E-08 |
| IKZF2                                             | 5.192899 | 5.79E-38 | 1.25E-36 | IGF1R       | 2.41391  | 1.2E-08  | 1.43E-07 |
| ITGB8                                             | 9.726902 | 8.17E-38 | 1.75E-36 | ERBB2       | 1.656501 | 2.23E-08 | 2.57E-07 |
| MMP2                                              | 9.701391 | 1.44E-37 | 3.06E-36 | MCL1        | 1.634262 | 2.76E-07 | 2.67E-06 |
| IRS1                                              | 2.004455 | 1.37E-32 | 2.38E-31 | ADAM17      | 1.251827 | 2.86E-07 | 2.75E-06 |
| SOX9                                              | 5.010745 | 1.77E-32 | 3.04E-31 | KLF5        | 1.347851 | 4.58E-07 | 4.26E-06 |
| AXL                                               | 8.410465 | 2.26E-31 | 3.66E-30 | MDM2        | 1.970244 | 4.89E-07 | 4.52E-06 |
| CDC42                                             | 2.483095 | 5.97E-30 | 8.95E-29 | PER1        | 2.023664 | 7.61E-06 | 5.64E-05 |
| SRGAP1                                            | 2.476042 | 3.75E-29 | 5.44E-28 | MFS1        | 3.962113 | 1.12E-05 | 7.99E-05 |
| FOSL1                                             | 8.730778 | 4.47E-29 | 6.45E-28 | BCL2L2      | 1.81349  | 1.19E-05 | 8.5E-05  |

|         |          |          |          |          |          |          |          |
|---------|----------|----------|----------|----------|----------|----------|----------|
| SOD2    | 1.756923 | 3.32E-28 | 4.61E-27 | DUSP10   | 2.069389 | 2.15E-05 | 0.000145 |
| COL4A1  | 8.380982 | 9.41E-28 | 1.28E-26 | TPM1     | 1.678562 | 3.57E-05 | 0.00023  |
| HPGD    | 2.971122 | 1.83E-25 | 2.22E-24 | ITGA6    | 1.844219 | 3.97E-05 | 0.000254 |
| MICAL2  | 4.753644 | 3.79E-25 | 4.51E-24 | PPP2R2A  | 1.330882 | 0.000222 | 0.001176 |
| DDIT4   | 1.642716 | 2.84E-24 | 3.22E-23 | NRAS     | 1.502914 | 0.000333 | 0.001681 |
| RPS6KA1 | 1.448549 | 7.13E-24 | 7.87E-23 | PRDM1    | 2.338897 | 0.000401 | 0.001961 |
| GRN     | 2.481532 | 7.6E-23  | 7.98E-22 | SERPINE1 | 1.74347  | 0.000792 | 0.003563 |
| HOXA9   | 7.575309 | 1.51E-22 | 1.55E-21 | MAP3K9   | 1.379357 | 0.001364 | 0.005752 |
| KLF12   | 7.94246  | 2.65E-22 | 2.69E-21 | ESR1     | 3.454686 | 0.002396 | 0.009342 |
| GNAI3   | 1.629895 | 2.86E-21 | 2.74E-20 | MXD1     | 1.428344 | 0.002556 | 0.00986  |
| FGFR2   | 5.068426 | 4.64E-21 | 4.38E-20 | CYP24A1  | 2.891982 | 0.003384 | 0.012591 |
| STAT1   | 1.302056 | 2.72E-20 | 2.47E-19 | MMP1     | 2.249509 | 0.004504 | 0.01604  |
| LIPA    | 1.950039 | 9.21E-19 | 7.68E-18 | NEDD9    | 1.579318 | 0.005741 | 0.019756 |
| MMP1    | 8.749504 | 1.87E-18 | 1.52E-17 | VDR      | 1.241639 | 0.00652  | 0.021965 |
| RTKN    | 1.523199 | 2.7E-18  | 2.16E-17 | ADAMTS6  | 1.447687 | 0.00655  | 0.022043 |
| FOS     | 6.578145 | 2.9E-18  | 2.32E-17 | SMAD7    | 1.655764 | 0.006856 | 0.022867 |
| MXD1    | 2.177361 | 4.45E-17 | 3.29E-16 | MYO6     | 1.472437 | 0.007603 | 0.024902 |
| TPM1    | 1.431471 | 4.11E-16 | 2.86E-15 | VEGFA    | 1.257589 | 0.009531 | 0.030038 |
| MAP3K9  | 2.42381  | 4.16E-16 | 2.89E-15 | BBC3     | 1.794102 | 0.015462 | 0.044804 |
| APAF1   | 2.127165 | 1.07E-15 | 7.23E-15 | MFSD1    | 1.274416 | 0.020126 | 0.055643 |
| L1CAM   | 8.61924  | 2.46E-15 | 1.62E-14 | ROBO2    | 2.061041 | 0.139751 | 0.254676 |
| SPRY2   | 3.924136 | 5.28E-14 | 3.19E-13 | L1CAM    | 1.241457 | 0.306163 | 0.452907 |
| ARF4    | 1.511863 | 5.74E-14 | 3.45E-13 | HNF4A    | 1.2583   | 0.453413 | NA       |
| MTAP    | 1.310394 | 2.14E-13 | 1.24E-12 | SHROOM2  | 1.81136  | 0.280631 | NA       |
| TCF7    | 3.530696 | 3.78E-13 | 2.16E-12 | CDKN1A   | 3.753737 | NA       | NA       |
| SWAP70  | 1.862844 | 1.13E-12 | 6.21E-12 | GAS1     | 1.849938 | 0.236601 | NA       |
| BTG2    | 1.699401 | 1.18E-12 | 6.44E-12 |          |          |          |          |
| SOX2    | 5.682976 | 4.56E-11 | 2.16E-10 |          |          |          |          |
| BAK1    | 1.82553  | 5.19E-11 | 2.45E-10 |          |          |          |          |
| PRDM1   | 3.500605 | 1.17E-10 | 5.39E-10 |          |          |          |          |
| MUC1    | 6.045027 | 1.25E-10 | 5.72E-10 |          |          |          |          |
| MSH2    | 2.079052 | 2.58E-10 | 1.14E-09 |          |          |          |          |
| VDR     | 1.799286 | 3.62E-10 | 1.59E-09 |          |          |          |          |
| RICTOR  | 1.558435 | 7.8E-10  | 3.33E-09 |          |          |          |          |
| PER1    | 1.545091 | 2.15E-09 | 8.86E-09 |          |          |          |          |
| NOTCH1  | 1.752205 | 3.14E-09 | 1.28E-08 |          |          |          |          |
| ADAMTS6 | 3.378835 | 4.38E-09 | 1.75E-08 |          |          |          |          |
| PCTP    | 1.554791 | 7.95E-09 | 3.11E-08 |          |          |          |          |
| DUSP10  | 1.845003 | 4.84E-08 | 1.77E-07 |          |          |          |          |
| RB1     | 1.204679 | 5.63E-08 | 2.05E-07 |          |          |          |          |

|         |          |          |          |
|---------|----------|----------|----------|
| YES1    | 1.301196 | 1.72E-06 | 5.39E-06 |
| EIF5A2  | 1.398772 | 0.000124 | 0.000311 |
| CYP24A1 | 4.414196 | 0.000159 | 0.000392 |
| FLI1    | 4.047192 | 0.000207 | 0.000501 |
| NEDD9   | 1.636026 | 0.000325 | 0.000766 |
| COL3A1  | 2.907007 | 0.004391 | 0.008629 |
| ESR1    | 3.297547 | 0.011259 | 0.020435 |
| DNMT3B  | 1.904237 | 0.022561 | 0.038526 |
| IL12A   | 2.328211 | 0.053321 | 0.08411  |
| ROBO2   | 1.784338 | 0.268362 | NA       |

FC: Fold Change
