# Supplementary material for: Fibronectin Modulates the Expression of miRNAs in Prostate Cancer Cell Lines
Source: PubMed Central journal article supplement (PMC9310065; doi:10.3389/fvets.2022.879997), 2022-07-11
Supplement: Table_2.pdf [file Table_2.pdf]

| <i>LNCaP</i> |              |                       | <i>PC-3</i>  |              |                       |
|--------------|--------------|-----------------------|--------------|--------------|-----------------------|
| <b>Node1</b> | <b>Node2</b> | <b>Combined Score</b> | <b>Node1</b> | <b>Node2</b> | <b>Combined Score</b> |
| CCND2        | CDK6         | 0.993                 | MDM2         | TP53         | 0.999                 |
| CDK6         | CCND2        | 0.993                 | TP53         | MDM2         | 0.999                 |
| BAK1         | MCL1         | 0.992                 | CDKN1A       | TP53         | 0.996                 |
| MCL1         | BAK1         | 0.992                 | TP53         | CDKN1A       | 0.996                 |
| JAG1         | NOTCH1       | 0.991                 | ERBB2        | ERBB3        | 0.991                 |
| NOTCH1       | JAG1         | 0.991                 | ERBB3        | ERBB2        | 0.991                 |
| CCND2        | CDKN1A       | 0.99                  | CCND2        | CDKN1A       | 0.99                  |
| CDK6         | RB1          | 0.99                  | CDKN1A       | CCND2        | 0.99                  |
| CDKN1A       | CCND2        | 0.99                  | BBC3         | MCL1         | 0.987                 |
| RB1          | CDK6         | 0.99                  | MCL1         | BBC3         | 0.987                 |
| CDK6         | CDKN1A       | 0.989                 | PTEN         | TP53         | 0.984                 |
| CDKN1A       | CDK6         | 0.989                 | TP53         | PTEN         | 0.984                 |
| CCND2        | RB1          | 0.981                 | MDM2         | TP63         | 0.983                 |
| RB1          | CCND2        | 0.981                 | TP63         | MDM2         | 0.983                 |
| JAG1         | NOTCH2       | 0.978                 | ESR1         | IGF1R        | 0.976                 |
| NOTCH2       | JAG1         | 0.978                 | IGF1R        | ESR1         | 0.976                 |
| APAF1        | BAK1         | 0.951                 | DLL1         | NOTCH1       | 0.953                 |
| BAK1         | APAF1        | 0.951                 | NOTCH1       | DLL1         | 0.953                 |
| MMP2         | TIMP3        | 0.949                 | IGF1R        | MDM2         | 0.95                  |
| TIMP3        | MMP2         | 0.949                 | MDM2         | IGF1R        | 0.95                  |
| HMGA2        | RB1          | 0.948                 | TP53         | TP63         | 0.95                  |
| RB1          | HMGA2        | 0.948                 | TP63         | TP53         | 0.95                  |
| FOS          | SMAD3        | 0.947                 | ESR1         | STAT5A       | 0.949                 |
| SMAD3        | FOS          | 0.947                 | MMP2         | TIMP3        | 0.949                 |
| SMAD3        | VDR          | 0.947                 | STAT5A       | ESR1         | 0.949                 |
| VDR          | SMAD3        | 0.947                 | TIMP3        | MMP2         | 0.949                 |
| ESR1         | SMAD3        | 0.945                 | BBC3         | TP53         | 0.947                 |
| SMAD3        | ESR1         | 0.945                 | TP53         | BBC3         | 0.947                 |

|      |      |       |       |       |       |
|------|------|-------|-------|-------|-------|
| ESR1 | FOS  | 0.939 | CD44  | ERBB2 | 0.945 |
| FOS  | ESR1 | 0.939 | ERBB2 | CD44  | 0.945 |

**Supp. Table II.** Continued

| <i>LNCaP</i> |              |                       | <i>PC-3</i>  |              |                       |
|--------------|--------------|-----------------------|--------------|--------------|-----------------------|
| <b>Node1</b> | <b>Node2</b> | <b>Combined Score</b> | <b>Node1</b> | <b>Node2</b> | <b>Combined Score</b> |
| CDKN1A       | RB1          | 0.935                 | ESR1         | FOS          | 0.939                 |
| RB1          | CDKN1A       | 0.935                 | FOS          | ESR1         | 0.939                 |
| CDC42        | GNAI3        | 0.934                 | ERBB2        | NRAS         | 0.934                 |
| GNAI3        | CDC42        | 0.934                 | ERBB3        | NRAS         | 0.934                 |
| ADAM17       | JAG1         | 0.932                 | NRAS         | ERBB3        | 0.934                 |
| JAG1         | ADAM17       | 0.932                 | NRAS         | ERBB2        | 0.934                 |
| CDC42        | SRGAP1       | 0.929                 | FGFR2        | NRAS         | 0.93                  |
| SRGAP1       | CDC42        | 0.929                 | NRAS         | FGFR2        | 0.93                  |
| ADAM17       | NOTCH1       | 0.928                 | ADAM17       | NOTCH1       | 0.928                 |
| NOTCH1       | ADAM17       | 0.928                 | NOTCH1       | ADAM17       | 0.928                 |
| SMAD3        | TGFBR2       | 0.927                 | MCL1         | TP53         | 0.927                 |
| TGFBR2       | SMAD3        | 0.927                 | TP53         | MCL1         | 0.927                 |
| ESR1         | GNAI3        | 0.925                 | ITGA6        | LAMC2        | 0.916                 |
| GNAI3        | ESR1         | 0.925                 | LAMC2        | ITGA6        | 0.916                 |
| HMGA2        | SMAD3        | 0.924                 | CCND2        | STAT5A       | 0.914                 |
| SMAD3        | HMGA2        | 0.924                 | STAT5A       | CCND2        | 0.914                 |
| CDKN1A       | SMAD3        | 0.923                 | ADAM17       | DLL1         | 0.911                 |
| SMAD3        | CDKN1A       | 0.923                 | DLL1         | ADAM17       | 0.911                 |
| CDC42        | MET          | 0.922                 | MMP1         | MMP2         | 0.911                 |
| MET          | CDC42        | 0.922                 | MMP2         | MMP1         | 0.911                 |
| CDC42        | MAP3K9       | 0.921                 | FOS          | SOX2         | 0.908                 |
| MAP3K9       | CDC42        | 0.921                 | SOX2         | FOS          | 0.908                 |
| ETS1         | FOS          | 0.919                 | FOS          | STAT5A       | 0.903                 |
| FOS          | ETS1         | 0.919                 | SERPINE1     | SMAD7        | 0.903                 |
| ITGA6        | LAMC2        | 0.916                 | SMAD7        | SERPINE1     | 0.903                 |
| LAMC2        | ITGA6        | 0.916                 | STAT5A       | FOS          | 0.903                 |
| FGFR2        | SPRY2        | 0.914                 | BTG2         | TP53         | 0.902                 |

|       |     |       |       |       |       |
|-------|-----|-------|-------|-------|-------|
| ITGA6 | MET | 0.914 | ERBB3 | ITGA6 | 0.902 |
|-------|-----|-------|-------|-------|-------|

**Supp. Table II.** Continued

| <i>LNCaP</i> |              |                       | <i>PC-3</i>  |              |                       |
|--------------|--------------|-----------------------|--------------|--------------|-----------------------|
| <b>Node1</b> | <b>Node2</b> | <b>Combined Score</b> | <b>Node1</b> | <b>Node2</b> | <b>Combined Score</b> |
| MET          | ITGA6        | 0.914                 | ITGA6        | ERBB3        | 0.902                 |
| SPRY2        | FGFR2        | 0.914                 | MDM2         | PTEN         | 0.902                 |
| CDC42        | YES1         | 0.911                 | MMP1         | VEGFA        | 0.902                 |
| EPAS1        | SOX2         | 0.911                 | MMP2         | VEGFA        | 0.902                 |
| MMP1         | MMP2         | 0.911                 | PTEN         | MDM2         | 0.902                 |
| MMP2         | MMP1         | 0.911                 | TP53         | BTG2         | 0.902                 |
| SOX2         | EPAS1        | 0.911                 | VEGFA        | MMP2         | 0.902                 |
| YES1         | CDC42        | 0.911                 | VEGFA        | MMP1         | 0.902                 |
| LAMC2        | MET          | 0.91                  | CDKN1A       | MCL1         | 0.901                 |
| MET          | LAMC2        | 0.91                  | MCL1         | CDKN1A       | 0.901                 |
| FOS          | SOX2         | 0.908                 | ADAM17       | ERBB2        | 0.9                   |
| SOX2         | FOS          | 0.908                 | BBC3         | TP63         | 0.9                   |
| FGFR2        | STAT1        | 0.907                 | CDKN1A       | STAT5A       | 0.9                   |
| STAT1        | FGFR2        | 0.907                 | DDIT4        | TP63         | 0.9                   |
| MCL1         | STAT1        | 0.905                 | DDIT4        | TP53         | 0.9                   |
| STAT1        | MCL1         | 0.905                 | ERBB2        | ADAM17       | 0.9                   |
| SERPINE1     | SMAD3        | 0.904                 | ERBB3        | LAMC2        | 0.9                   |
| SMAD3        | SERPINE1     | 0.904                 | FGFR2        | FOS          | 0.9                   |
| CDC42        | LAMC2        | 0.902                 | FOS          | NOTCH1       | 0.9                   |
| FOS          | FOSL1        | 0.902                 | FOS          | FGFR2        | 0.9                   |
| FOSL1        | FOS          | 0.902                 | LAMC2        | MMP2         | 0.9                   |
| LAMC2        | CDC42        | 0.902                 | LAMC2        | ERBB3        | 0.9                   |
| CDKN1A       | STAT1        | 0.901                 | MDM2         | MYO6         | 0.9                   |
| CDKN1A       | MCL1         | 0.901                 | MMP2         | LAMC2        | 0.9                   |
| MCL1         | CDKN1A       | 0.901                 | MYO6         | MDM2         | 0.9                   |
| STAT1        | CDKN1A       | 0.901                 | NOTCH1       | FOS          | 0.9                   |
| CD44         | CDC42        | 0.9                   | PRDM1        | TP53         | 0.9                   |
| CDC42        | CD44         | 0.9                   | STAT5A       | CDKN1A       | 0.9                   |

|        |       |     |       |       |     |
|--------|-------|-----|-------|-------|-----|
| CDKN1A | FSCN1 | 0.9 | TIMP3 | TP53  | 0.9 |
| DDIT4  | TP63  | 0.9 | TP53  | TIMP3 | 0.9 |

**Supp. Table II. Continued**

| <i>LNCaP</i> |              |                       | <i>PC-3</i>  |              |                       |
|--------------|--------------|-----------------------|--------------|--------------|-----------------------|
| <b>Node1</b> | <b>Node2</b> | <b>Combined Score</b> | <b>Node1</b> | <b>Node2</b> | <b>Combined Score</b> |
| FGFR2        | FOS          | 0.9                   | TP53         | PRDM1        | 0.9                   |
| FOS          | MSH2         | 0.9                   | TP53         | DDIT4        | 0.9                   |
| FOS          | NOTCH1       | 0.9                   | TP63         | BBC3         | 0.9                   |
| FOS          | FGFR2        | 0.9                   | TP63         | DDIT4        | 0.9                   |
| FSCN1        | STAT1        | 0.9                   |              |              |                       |
| FSCN1        | MCL1         | 0.9                   |              |              |                       |
| FSCN1        | CDKN1A       | 0.9                   |              |              |                       |
| IL12A        | STAT1        | 0.9                   |              |              |                       |
| LAMC2        | MMP2         | 0.9                   |              |              |                       |
| MCL1         | FSCN1        | 0.9                   |              |              |                       |
| MMP2         | LAMC2        | 0.9                   |              |              |                       |
| MSH2         | FOS          | 0.9                   |              |              |                       |
| NOTCH1       | FOS          | 0.9                   |              |              |                       |
| STAT1        | IL12A        | 0.9                   |              |              |                       |
| STAT1        | FSCN1        | 0.9                   |              |              |                       |
| TP63         | DDIT4        | 0.9                   |              |              |                       |
